# Supplementary material for: Response Properties of Magnesium Doped Strontium Titanate Electrorheological Composite Hydrophilic Elastomers Based on Different Morphologies
Source: Preprints.org preprint supplement (doi:10.20944/preprints202406.0849.v1), 2024-06-12
Supplement: Supplementary file 1 [file supplementary]

**supplementary information**

**Response Properties of Magnesium Doped Strontium Titanate Electrorheological Composite Hydrophilic Elastomers Based on Different Morphologies**

Shu-Juan Gao 1,2,*, Lin-Zhi Li 1,2, Peng-Fei Han 3, Ling Wang 1, Feng Li 1, Tan-Lai Yu 1,2 and Yan-Fang Li 1,*

*1Department of Chemical and Materials Engineering, Lyuliang University, Lishi Shanxi 033001, China; shujuangao@llu.edu.cn (S.-J.G.)*

*2Institute of New Carbon-based Materials and Zero-carbon and Negative-carbon Technology, Lyuliang University, Lishi Shanxi 033001, China; shujuangao@llu.edu.cn (S.-J.G.)*

*3Institute of Teacher Education, Taiyuan Normal University, Taiyuan 030006, China; 201722801006@email.sxu.edu.cn (P.-F.H.)*

* Correspondence: shujuangao@llu.edu.cn; 20131017@llu.edu.cn

**Supplementary Information**

**Figure S1.** The storage modulus-frequency of the composite elastomers with different Mg-STO (a)~(e) 0 kV/mm, (a')~(e') 1.2 kV/mm, a a': without Mg-STO, b b': with spherical, c c': with dendritic, d d': with flake-like, and e e': with pinecone-like. The small panel at the upper left part show the maximum scanning resolution graphs corresponding to the four morphologies. The small panel at the upper right part shows the relative values of differences between the charged and uncharged modulus of energy storage for four shape products.
